# Supplementary material
Source: publisher figshare collection journal article supplement (https://acs.figshare.com/ndownloader/files/20168150)
Supplement: Supplementary file 1 [file 20168150]

## Supporting Information

# Dual-Band Electrochromic Devices with a Transparent Conductive Capacitive Charge- Balancing Anode

*Shengliang Zhang,<sup>†,‡</sup> Yang Li,<sup>†</sup> Tianran Zhang,<sup>†,‡</sup> Sheng Cao,<sup>†,‡</sup> Qiaofeng Yao,<sup>†</sup> Haibin Lin,<sup>†</sup>  
Hualin Ye,<sup>†</sup> Adrian Fisher,<sup>‡,§</sup> and Jim Yang Lee<sup>\*,†,‡</sup>*

<sup>†</sup> Department of Chemical and Biomolecular Engineering, National University of Singapore,  
10 Kent Ridge Crescent, Singapore 119260, Singapore

<sup>‡</sup> Cambridge Centre for Advanced Research and Education in Singapore, 1 Create Way,  
Singapore 138602, Singapore

<sup>§</sup> Department of Chemical Engineering and Biotechnology, University of Cambridge, West  
Cambridge Site, Philippa Fawcett Drive, Cambridge CB3 0AS, United Kingdom.

### Corresponding Author

\*Email: cheleejy@nus.edu.sg

## Supporting Figures and Table

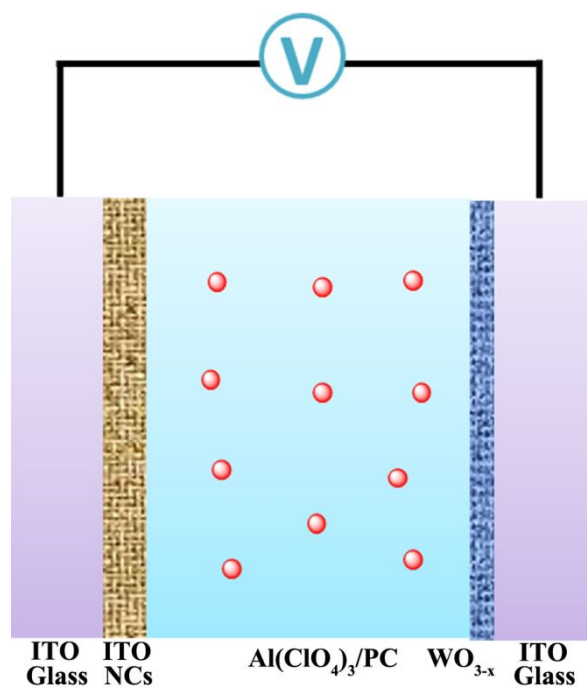

**Figure S1.** Schematic of DBED based on a  $\text{WO}_{3-x}$  cathode and an ITO NC anode.

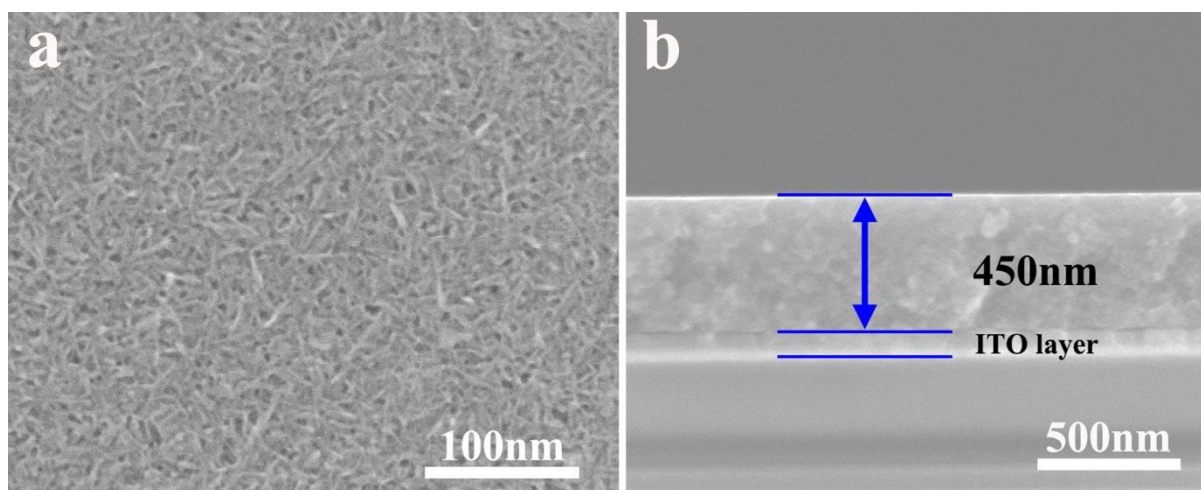

**Figure S2.** (a) Surface and (b) cross-sectional SEM images of the  $\text{WO}_{3-x}$  NW film.

**Table S1.** Chemical composition and bandgap of ITO NCs with different Sn-dopant contents.

| Nominal Sn at% | Sn at% estimated by ICP-OES | Band gap (eV) |
|----------------|-----------------------------|---------------|
| 0              | 0                           | 3.78          |
| 2              | 2.3                         | 3.97          |
| 4              | 4.5                         | 4.04          |
| 10             | 10.3                        | 4.15          |

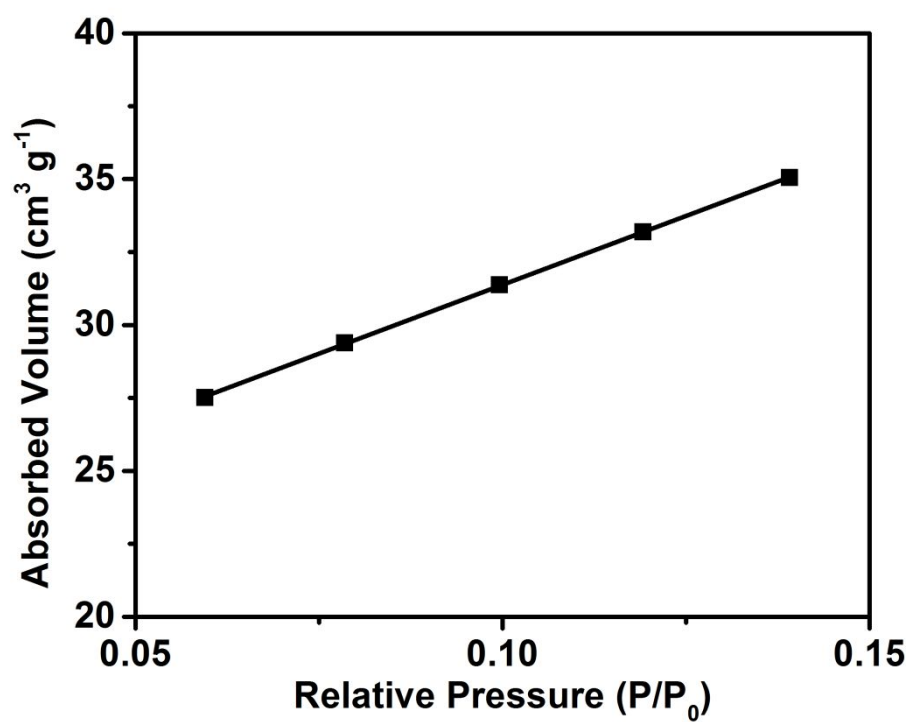

**Figure S3.** The N<sub>2</sub> adsorption isotherm of ITO NCs.

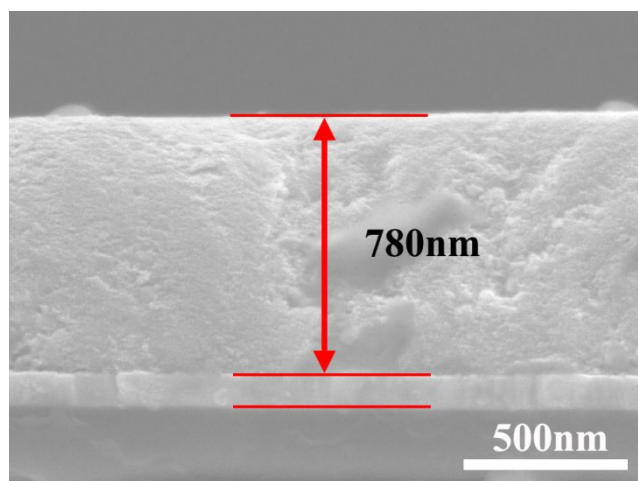

**Figure S4.** Cross-sectional SEM image of ITO-3L.

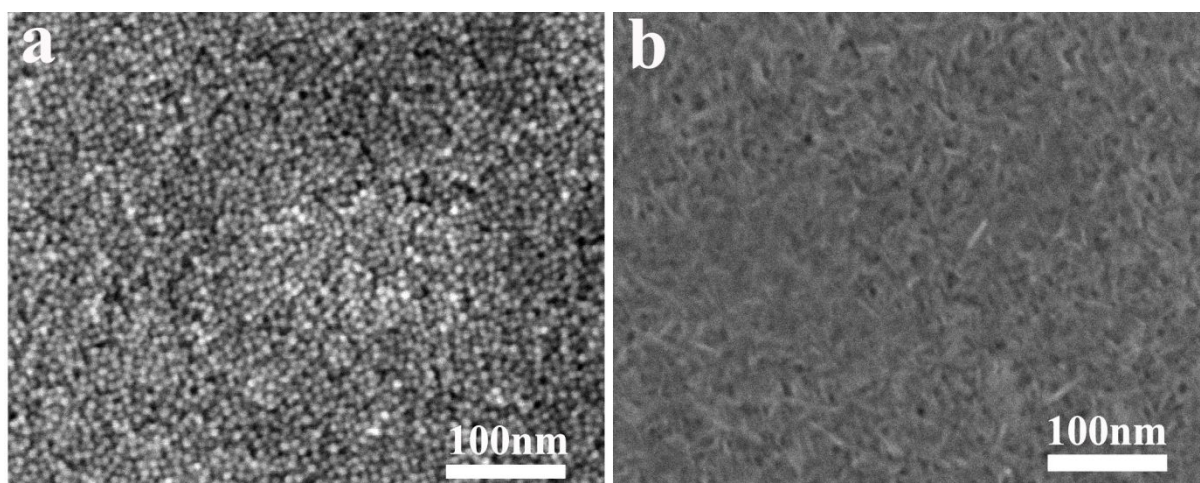

**Figure S5.** The SEM images of the ITO-6L anode (a) and WO<sub>3-x</sub> cathode (b) after 500 cycles.
